# Supplementary material for: Structure and function of human Naa60 (NatF), a Golgi-localized bi-functional acetyltransferase
Source: PubMed Central journal article supplement (PMC4993997; doi:10.1038/srep31425), 2016-08-23
Supplement: srep31425-s1.pdf [file srep31425-s1.pdf]

## Supplemental Information

### Structure and function of human Naa60 (NatF), a Golgi-localized bi-functional acetyltransferase

Ji-Yun Chen, Liang Liu, Chun-Ling Cao, Mei-Jun Li, Kemin Tan, Xiaohan Yang, and Cai-Hong Yun

## Supplemental Figures

**Figure S1. Catalytic efficiency of hNaa60(1-199) wild-type and mutant proteins.** The assays were done in triplicate. The error bars indicate standard deviation (SD) of every dot. The slope of the line indicates the  $k_{cat}/K_m$  value of the enzyme.

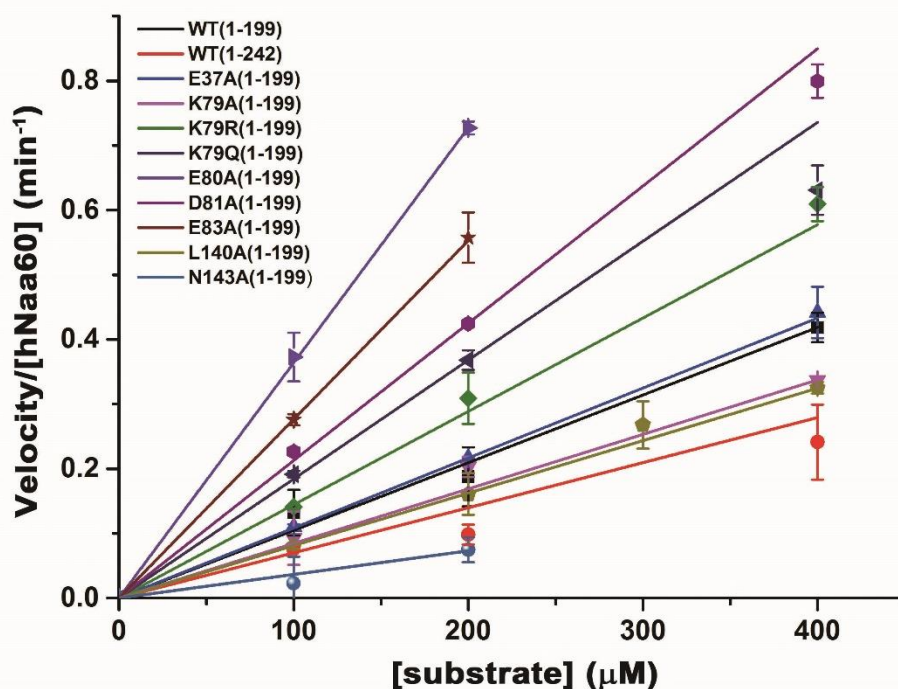

**Figure S2. The helical wheel projection diagram of  $\alpha 5$  helix of hNaa60.** Different colors are used to indicate residue property: yellow, typical hydrophobic residues; blue, basic residues; red, acidic residues; purple, uncharged hydrophilic residues; light-red, tyrosine and light-yellow, glycine.

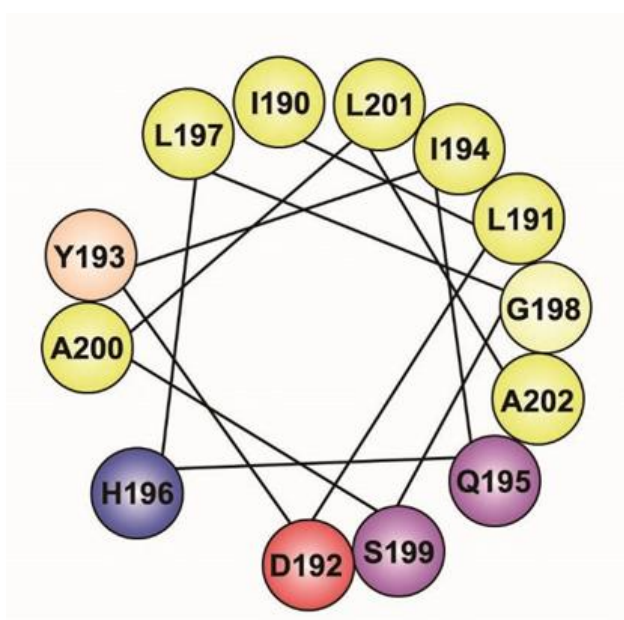

**Figure S3. Naa60(1-199) can acetylate H3-H4 tetramer in vitro.** Recombinant human Naa60 and human H3-H4 tetramer were used in these experiments. Recombinant human H3-H4 tetramer were purified as described<sup>1</sup> with minor modification. The hNaa60(1-199) protein (1  $\mu$ M) was mixed with Ac-CoA (240  $\mu$ M) and H3-H4 tetramer (14  $\mu$ M) and incubated in the reaction buffer (100 mM HEPES pH7.5, 100 mM NaCl) in a total volume of 50  $\mu$ l for 1h at 37 °C. The control group did not contain the enzyme. The concentration measurement of CoA was the same as the NAT-activity assay of hNaa60. Experiments were carried out in triplicate and error bars indicate standard deviation (SD).

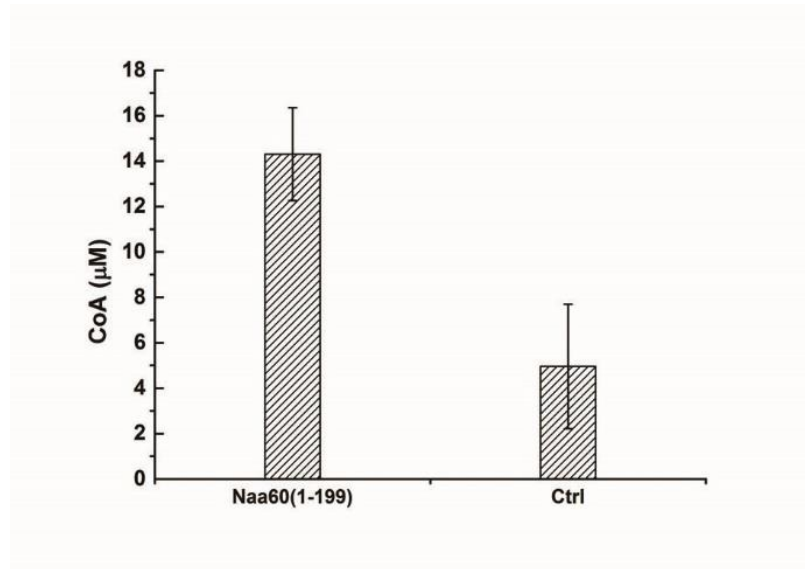

| Sample treatment                   | CoA production (μM) |
|------------------------------------|---------------------|
| H3-H4 plus Ac-CoA and Naa60(1-199) | 14.31 ±2.05         |
| H3-H4 plus Ac-CoA                  | 4.96 ±2.74          |

**Figure S4: Mass spectrometry analysis of acetylation status of H3-H4 tetramer with and without treatment with hNaa60(1-199).** Recombinant human Naa60 and human H3-H4 tetramer were used in the study. The hNaa60(1-199) protein (1  $\mu$ M) was mixed with Ac-CoA (240  $\mu$ M) and H3-H4 tetramer (14  $\mu$ M) and incubated in the reaction buffer (100 mM HEPES pH7.5, 100 mM NaCl) in a total volume of 50  $\mu$ l for 1 hour at 37  $^{\circ}$ C. The control group did not contain the enzyme. After terminating the reaction, the same amount of treated and untreated H3-H4 samples were applied to mass spectrometry analysis. All acetylated peptides detected by mass spectrometry were shown. Although mass spectrometry cannot accurately quantify different peptides due to different ionization efficiency *etc.*, the remarkably higher overall acetylation level and the changed acetylation profile of the hNaa60-treated sample compared to the un-treated sample indicated that hNaa60(1-199) does have KAT activity toward the H3-H4 tetramer *in vitro*.

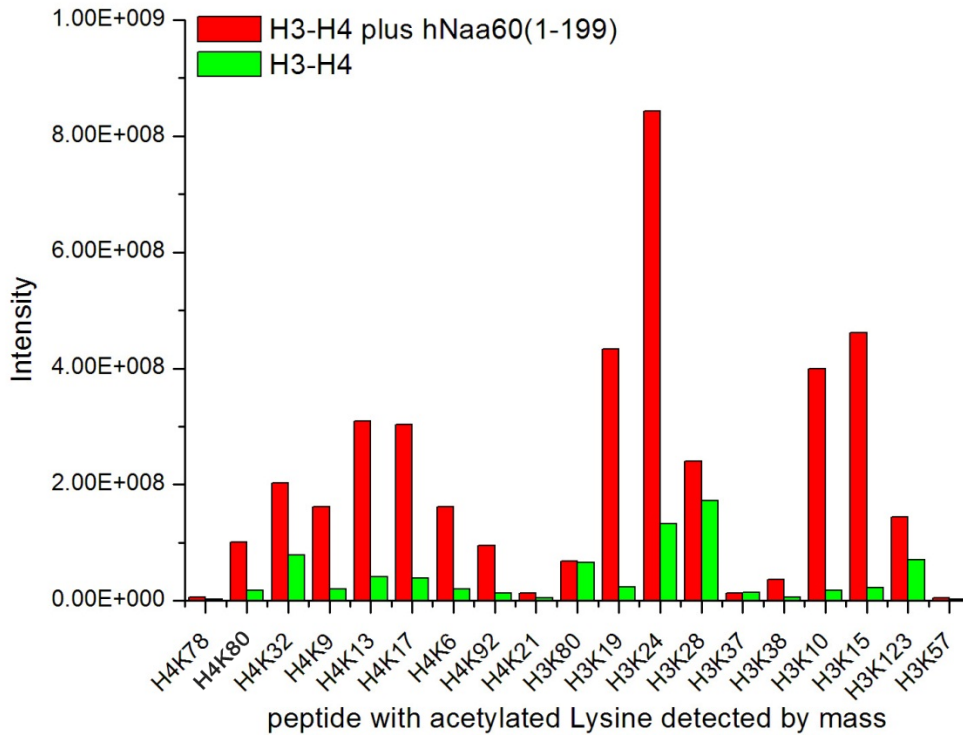

**Figure S5: Purity of the proteins analyzed by SDS-PAGE.**

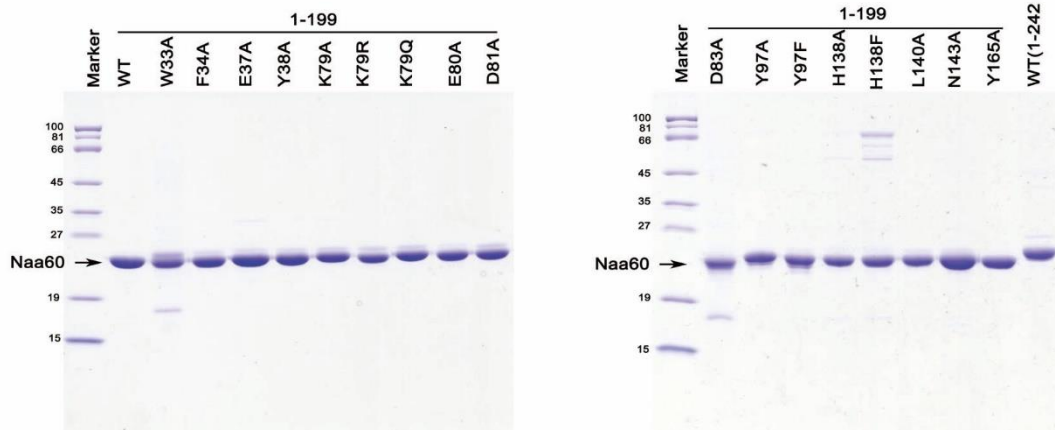

Figure S6. Mass spectrometry analysis of lysine residues of bacterially expressed hNaa60 (1-199).

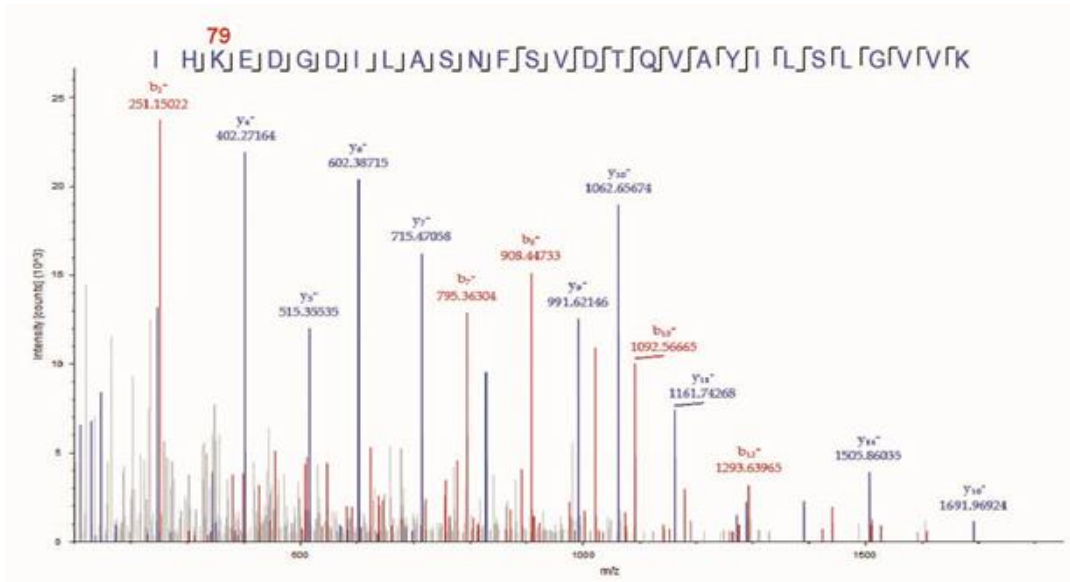

**Figure S7. Deletion mutations of  $\beta$ 3- $\beta$ 4 loop led to protein precipitation and aggregation.** The  $\beta$ 3- $\beta$ 4 loop (74-93 aa) were replaced by corresponding residues (SQNQ) of hNaa50p. The purification of hNaa60(1-199 $\Delta$ 74-93 SQNQ) was analyzed by Size-exclusion chromatography (A) and SDS-PAGE assay (B).

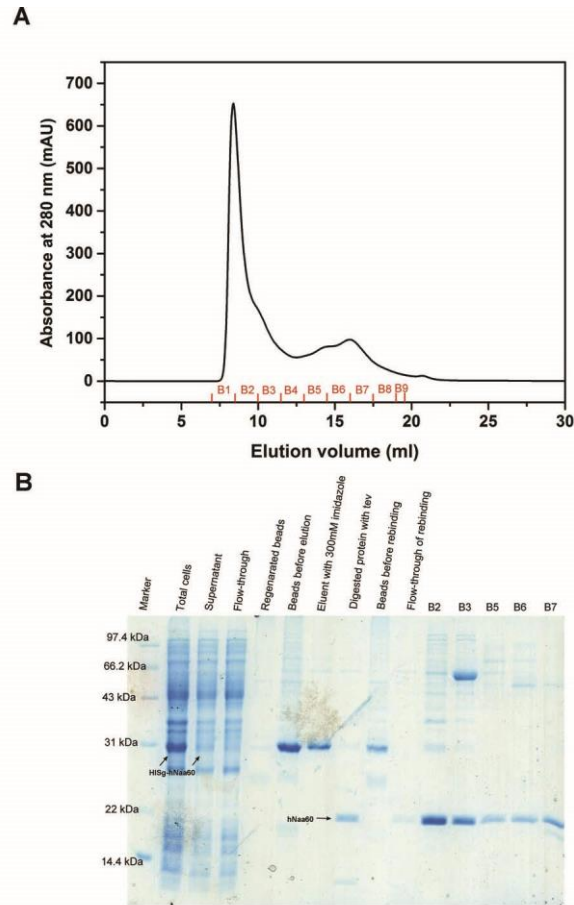

## Supplemental Tables

**Table S1. Acetylation status of peptide NH<sub>2</sub>-MKGKEEKEGGAR-COOH after treatment with hNaa60(1-199) analyzed by LC/MS/MS.**

| peptide           | intensity | modification                                 | activity |
|-------------------|-----------|----------------------------------------------|----------|
| EKEGGAR           | 1.268E6   | (none)                                       |          |
| GKEEKEGGAR        | 1.038E7   | N-Term (Acetyl)                              | NAT      |
| GKEEKEGGAR        | 7.004E8   | (none)                                       |          |
| K E E K E G G A R | 7.396E7   | (none)                                       |          |
| KGKEEKEGGAR       | 9.079E6   | N-Term (Acetyl)                              | NAT/KAT  |
| KGKEEKEGGAR       | 3.419E5   | K4 (Acetyl); K7 (Acetyl)                     | KAT      |
| KGKEEKEGGAR       | 1.228E9   | (none)                                       |          |
| MKGKEEKEGG        | 1.492E7   | (none)                                       |          |
| MKGKEEKEGGA       | 9.300E6   | N-Term (Acetyl); K2 (Acetyl)                 | NAT+KAT  |
| MKGKEEKEGGA       | 1.137E8   | N-Term (Acetyl)                              | NAT      |
| MKGKEEKEGGA       | 2.660E7   | (none)                                       |          |
| MKGKEEKEGGAR      | 3.944E7   | M1 (Oxidation); K2 (Acetyl);<br>K4 (Acetyl)  | KAT      |
| MKGKEEKEGGAR      | 2.669E6   | M1 (Oxidation); K2 (Acetyl)                  | KAT      |
| MKGKEEKEGGAR      | 1.949E9   | N-Term (Acetyl); K2 (Acetyl)                 | NAT+KAT  |
| MKGKEEKEGGAR      | 2.923E7   | N-Term (Acetyl); K4 (Acetyl);<br>K7 (Acetyl) | NAT+KAT  |
| MKGKEEKEGGAR      | 3.060E9   | M1 (Oxidation)                               |          |
| MKGKEEKEGGAR      | 1.988E10  | K2 (Acetyl)                                  | KAT      |
| MKGKEEKEGGAR      | 1.773E10  | (none)                                       |          |

### Reference:

- 1 Tanaka, Y. *et al.* Expression and purification of recombinant human histones. *Methods* **33**, 3-11, doi:10.1016/j.ymeth.2003.10.024 (2004).
